# Supplementary material
Source: PubMed Central journal article supplement (PMC7098005)
Supplement: ao9b04449_si_001.pdf [file ao9b04449_si_001.pdf]

## Supporting Information

### Highly Soluble Indigo Derivatives as Practical Diesel Absorption Markers

Sucheera Modsiri<sup>#,1</sup>, Prapinporn Pongmaneerat<sup>#,1</sup>, Sumana Tawil<sup>2</sup>, Vinich Promarak<sup>3</sup>,  
Patchanita Thamyongkit<sup>4,\*</sup>

<sup>1</sup> *Program in Petrochemistry and Polymer Science, Faculty of Science, Chulalongkorn University, Bangkok 10330, Thailand*

<sup>2</sup> *Program of Chemistry, Faculty of Science and Technology, Sakon Nakhon Rajabhat University, Sakon Nakhon 47000, Thailand*

<sup>3</sup> *Department of Material Science and Engineering, School of Molecular Science and Engineering, Vidyasirimedhi Institute of Science and Technology, Wangchan, Rayong 21210, Thailand*

<sup>4</sup> *Department of Chemistry, Faculty of Science, Chulalongkorn University, Bangkok 10330, Thailand*

<sup>#</sup>Contributed equally to this work

\*patchanita.v@chula.ac.th

### Table of Contents

|                                                  |         |
|--------------------------------------------------|---------|
| Characterization data of compound <b>1</b>       | S2–S3   |
| Characterization data of compound <b>2</b>       | S4–S5   |
| Characterization data of compound <b>3</b>       | S6–S7   |
| Characterization data of compound <b>4</b>       | S8–S9   |
| Characterization data of compound <b>5</b>       | S10–S11 |
| Characterization data of compound <b>6</b>       | S12–S13 |
| Standard calibration curves of compound <b>1</b> | S14     |
| Standard calibration curves of compound <b>3</b> | S15     |
| Standard calibration curves of compound <b>4</b> | S16     |
| Standard calibration curves of compound <b>5</b> | S17     |
| Standard calibration curves of compound <b>6</b> | S18     |

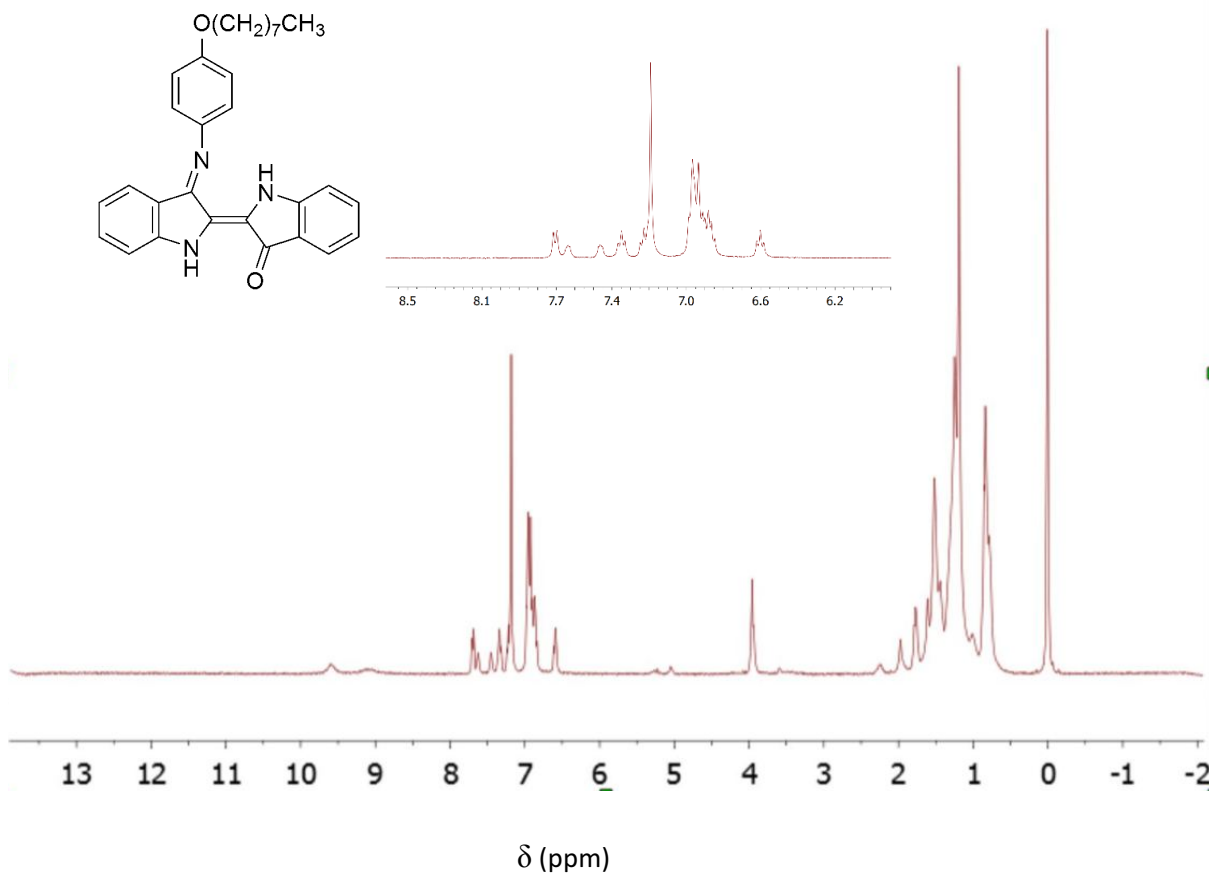

**Figure S1.**  $^1\text{H}$ -NMR spectrum of compound **1** in  $\text{CDCl}_3$

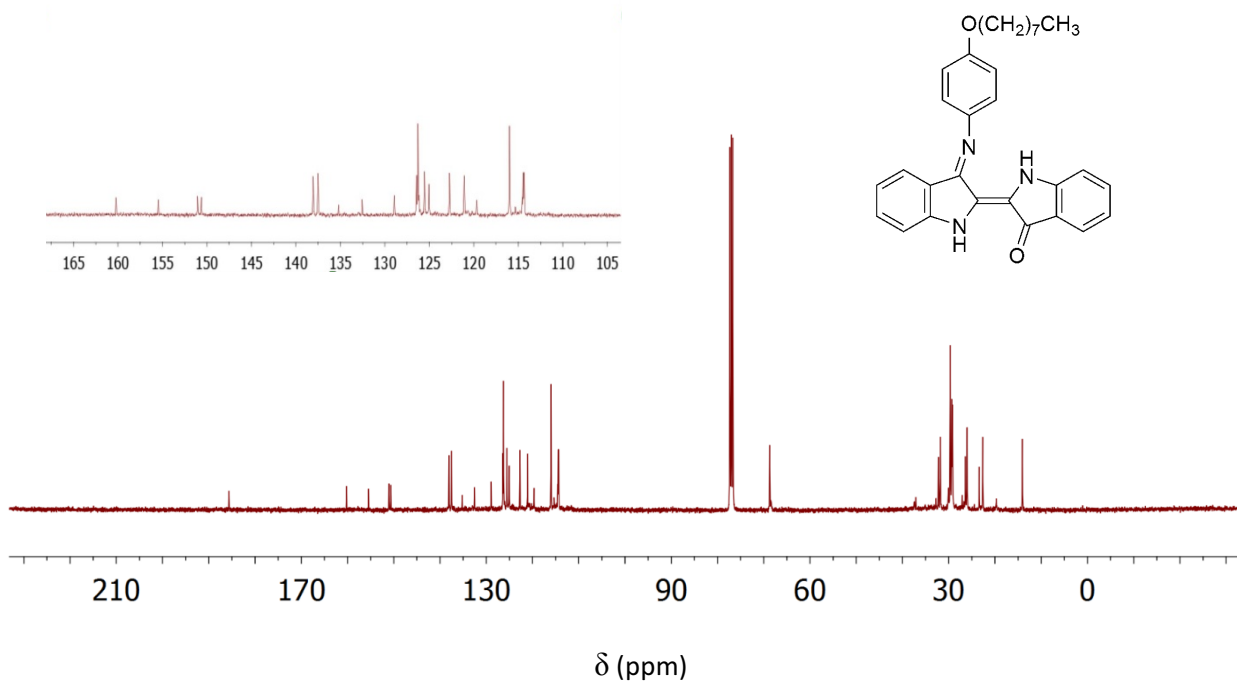

**Figure S2.**  $^{13}\text{C}$ -NMR spectrum of compound **1** in  $\text{CDCl}_3$

## Mass Spectrum List Report

### Analysis Info

Analysis Name OSSM580908001.d  
 Method MKE\_tune\_wide\_20130204.m  
 Sample Name mono-octa-indigo  
 mono-octa-indigo

Acquisition Date 9/8/2015 2:56:21 PM  
 Operator Administrator  
 Instrument micrOTOF 72

### Acquisition Parameter

Source Type ESI  
 Scan Range n/a  
 Scan Begin 50 m/z  
 Scan End 3000 m/z

Ion Polarity Positive  
 Capillary Exit 150.0 V  
 Hexapole RF 400.0 V  
 Skimmer 1 54.4 V  
 Hexapole 1 22.3 V

Set Corrector Fill 79 V  
 Set Pulsar Pull 406 V  
 Set Pulsar Push 388 V  
 Set Reflector 1300 V  
 Set Flight Tube 9000 V  
 Set Detector TOF 1910 V

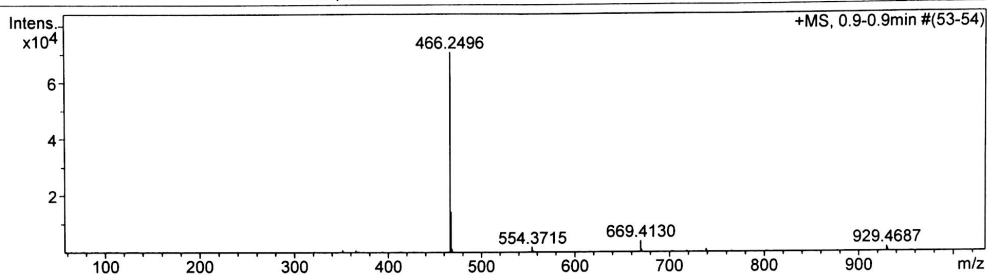

| #  | m/z       | I     | I %   | S/N    | FWHM   | Res.  |
|----|-----------|-------|-------|--------|--------|-------|
| 1  | 56.1203   | 452   | 0.6   | 113.6  | 0.0051 | 11012 |
| 2  | 58.5853   | 275   | 0.4   | 69.0   | 0.0052 | 11249 |
| 3  | 77.3119   | 444   | 0.6   | 111.6  | 0.0061 | 12726 |
| 4  | 129.8628  | 326   | 0.5   | 81.7   | 0.0078 | 16749 |
| 5  | 161.2223  | 277   | 0.4   | 68.8   | 0.0087 | 18470 |
| 6  | 165.3812  | 305   | 0.4   | 75.8   | 0.0087 | 19078 |
| 7  | 351.2127  | 809   | 1.1   | 175.3  | 0.0427 | 8224  |
| 8  | 365.2252  | 705   | 1.0   | 142.1  | 0.0434 | 8415  |
| 9  | 367.2420  | 274   | 0.4   | 54.7   | 0.0520 | 7059  |
| 10 | 413.2630  | 303   | 0.4   | 49.2   | 0.0474 | 8726  |
| 11 | 466.2496  | 70618 | 100.0 | 9505.3 | 0.0601 | 7761  |
| 12 | 467.2524  | 14411 | 20.4  | 1933.2 | 0.0542 | 8613  |
| 13 | 468.2531  | 1165  | 1.6   | 155.5  | 0.0545 | 8590  |
| 14 | 554.3715  | 1706  | 2.4   | 189.0  | 0.0555 | 9990  |
| 15 | 555.3760  | 564   | 0.8   | 62.4   | 0.0538 | 10331 |
| 16 | 669.4130  | 3855  | 5.5   | 495.7  | 0.0738 | 9072  |
| 17 | 670.4198  | 930   | 1.3   | 119.5  | 0.0828 | 8100  |
| 18 | 702.2994  | 370   | 0.5   | 49.6   | 0.0742 | 9465  |
| 19 | 718.2689  | 502   | 0.7   | 69.0   | 0.0561 | 12795 |
| 20 | 738.3037  | 1065  | 1.5   | 150.9  | 0.1171 | 6303  |
| 21 | 739.3093  | 508   | 0.7   | 71.9   | 0.0671 | 11013 |
| 22 | 765.2539  | 286   | 0.4   | 41.1   | 0.0179 | 42686 |
| 23 | 929.4687  | 1716  | 2.4   | 282.9  | 0.0784 | 11855 |
| 24 | 930.4742  | 982   | 1.4   | 162.0  | 0.0725 | 12837 |
| 25 | 1449.7210 | 279   | 0.4   | 73.8   | 0.0263 | 55034 |
| 26 | 1615.3928 | 275   | 0.4   | 82.7   | 0.0265 | 61038 |
| 27 | 1708.2307 | 296   | 0.4   | 96.0   | 0.0276 | 61804 |
| 28 | 2351.0449 | 797   | 1.1   | 255.5  | 0.0311 | 75650 |
| 29 | 2414.7219 | 273   | 0.4   | 88.7   | 0.0327 | 73834 |
| 30 | 2544.3511 | 300   | 0.4   | 99.7   | 0.0337 | 75412 |

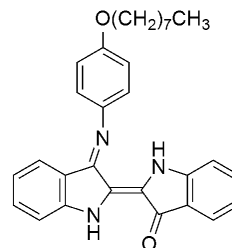

Chemical Formula: C<sub>30</sub>H<sub>31</sub>N<sub>3</sub>O<sub>2</sub>  
 Exact Mass: 465.2416  
 Molecular Weight: 465.5860  
 [M+H]<sup>+</sup>: 466.2495

**Figure S3.** HR-ESI mass spectrum of compound 1

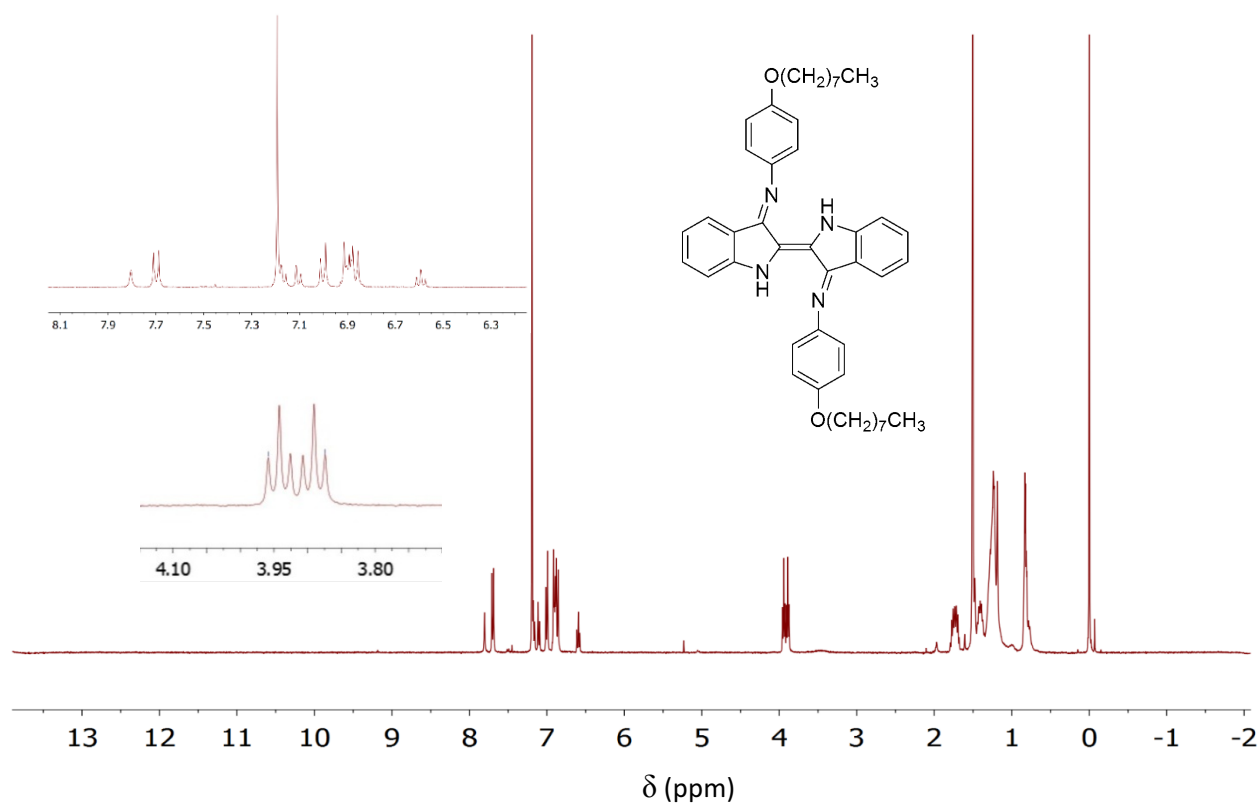

**Figure S4.**  $^1\text{H-NMR}$  spectrum of compound **2** in  $\text{CDCl}_3$

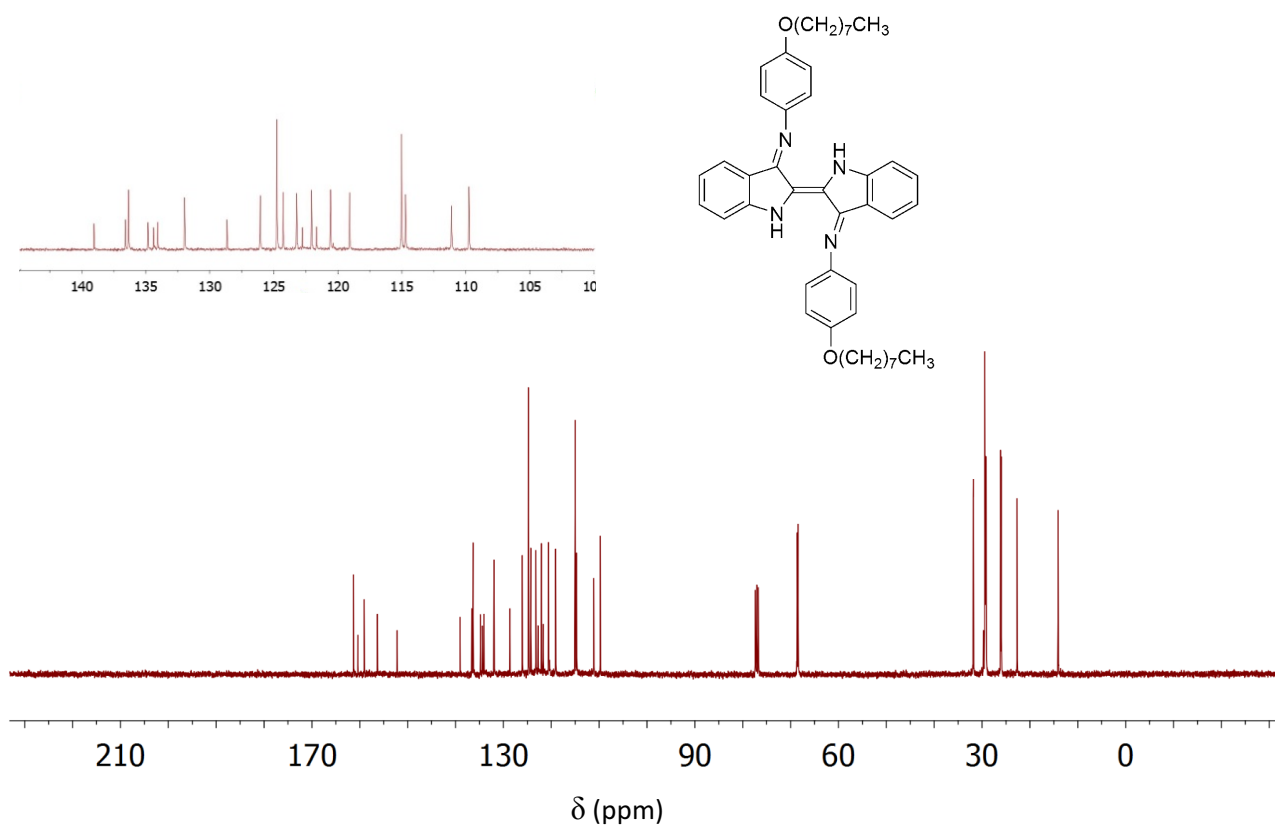

**Figure S5.**  $^{13}\text{C-NMR}$  spectrum of compound **2** in  $\text{CDCl}_3$

## Mass Spectrum List Report

### Analysis Info

Analysis Name OSCUSM580217001.d  
 Method Tune\_low\_POS\_Natee20130403.m  
 Sample Name Octyl-indigo  
 Octyl-indigo

Acquisition Date 2/18/2015 12:41:51 AM  
 Operator Administrator  
 Instrument micrOTOF 72

### Acquisition Parameter

|             |          |                |          |                    |        |
|-------------|----------|----------------|----------|--------------------|--------|
| Source Type | ESI      | Ion Polarity   | Positive | Set Corrector Fill | 79 V   |
| Scan Range  | n/a      | Capillary Exit | 150.0 V  | Set Pulsar Pull    | 406 V  |
| Scan Begin  | 50 m/z   | Hexapole RF    | 120.0 V  | Set Pulsar Push    | 388 V  |
| Scan End    | 3000 m/z | Skimmer 1      | 45.0 V   | Set Reflector      | 1300 V |
|             |          | Hexapole 1     | 24.3 V   | Set Flight Tube    | 9000 V |
|             |          |                |          | Set Detector TOF   | 1910 V |

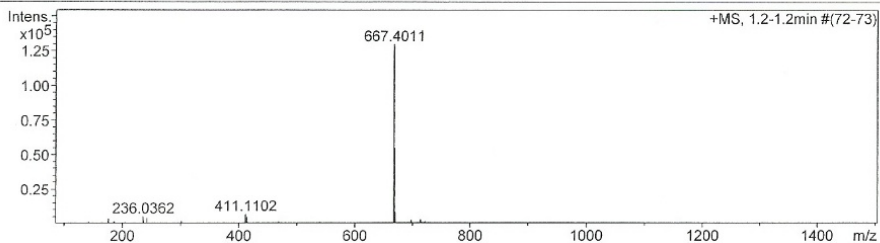

| #  | m/z      | I      | I%    | S/N    | FWHM   | Res. |
|----|----------|--------|-------|--------|--------|------|
| 1  | 142.1620 | 1156   | 0.9   | 73.5   | 0.0254 | 5600 |
| 2  | 176.0837 | 3410   | 2.6   | 216.9  | 0.0318 | 5534 |
| 3  | 184.2065 | 882    | 0.7   | 55.7   | 0.0306 | 6022 |
| 4  | 186.2233 | 1396   | 1.1   | 88.4   | 0.0294 | 6343 |
| 5  | 204.0639 | 794    | 0.6   | 50.0   | 0.0308 | 6620 |
| 6  | 205.0722 | 885    | 0.7   | 55.8   | 0.0330 | 6217 |
| 7  | 236.0362 | 5198   | 4.0   | 328.9  | 0.0352 | 6704 |
| 8  | 242.2839 | 3834   | 3.0   | 242.4  | 0.0348 | 6957 |
| 9  | 243.2874 | 597    | 0.5   | 37.3   | 0.0397 | 6123 |
| 10 | 301.1432 | 1686   | 1.3   | 105.7  | 0.0419 | 7179 |
| 11 | 378.1307 | 628    | 0.5   | 38.3   | 0.0586 | 6458 |
| 12 | 411.1102 | 6874   | 5.3   | 418.8  | 0.0519 | 7917 |
| 13 | 412.1152 | 1278   | 1.0   | 77.4   | 0.0534 | 7722 |
| 14 | 413.2682 | 4849   | 3.8   | 294.9  | 0.0504 | 8196 |
| 15 | 414.2719 | 1006   | 0.8   | 60.7   | 0.0576 | 7197 |
| 16 | 429.3158 | 597    | 0.5   | 35.6   | 0.0597 | 7188 |
| 17 | 468.2285 | 1384   | 1.1   | 82.0   | 0.0583 | 8033 |
| 18 | 539.2797 | 852    | 0.7   | 48.8   | 0.0700 | 7706 |
| 19 | 667.4011 | 129147 | 100.0 | 6391.5 | 0.0951 | 7020 |
| 20 | 668.4044 | 54784  | 42.4  | 2707.8 | 0.0933 | 7166 |
| 21 | 669.4046 | 8322   | 6.4   | 410.4  | 0.0832 | 8047 |
| 22 | 670.4117 | 877    | 0.7   | 42.6   | 0.0919 | 7294 |
| 23 | 697.4112 | 2359   | 1.8   | 112.2  | 0.0920 | 7581 |
| 24 | 698.4115 | 1038   | 0.8   | 49.0   | 0.0968 | 7218 |
| 25 | 699.4071 | 632    | 0.5   | 29.6   | 0.0922 | 7586 |
| 26 | 713.4057 | 2635   | 2.0   | 123.3  | 0.1004 | 7106 |
| 27 | 714.4105 | 1286   | 1.0   | 59.8   | 0.0901 | 7931 |
| 28 | 715.4112 | 787    | 0.6   | 36.4   | 0.0851 | 8411 |
| 29 | 721.3740 | 1446   | 1.1   | 66.8   | 0.1011 | 7135 |
| 30 | 722.3719 | 636    | 0.5   | 29.1   | 0.0836 | 8641 |

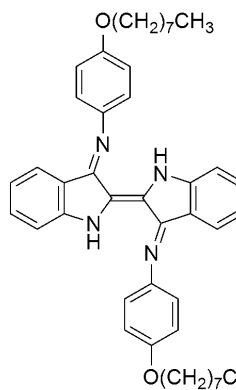

Chemical Formula: C<sub>44</sub>H<sub>52</sub>N<sub>4</sub>O<sub>2</sub>  
 Exact Mass: 668.4090  
 Molecular Weight: 668.9093  
 [M-H]<sup>+</sup>: 667.4012

**Figure S6.** HR-ESI mass spectrum of compound **2**

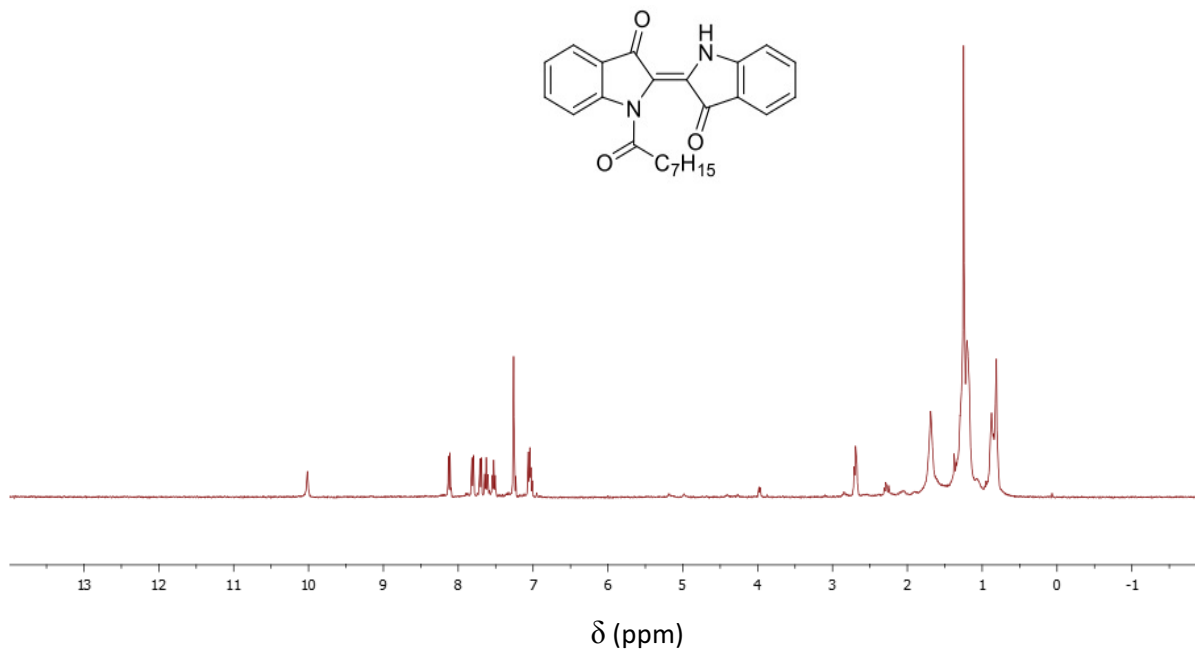

**Figure S7.** <sup>1</sup>H-NMR spectrum of compound **3** in CDCl<sub>3</sub>

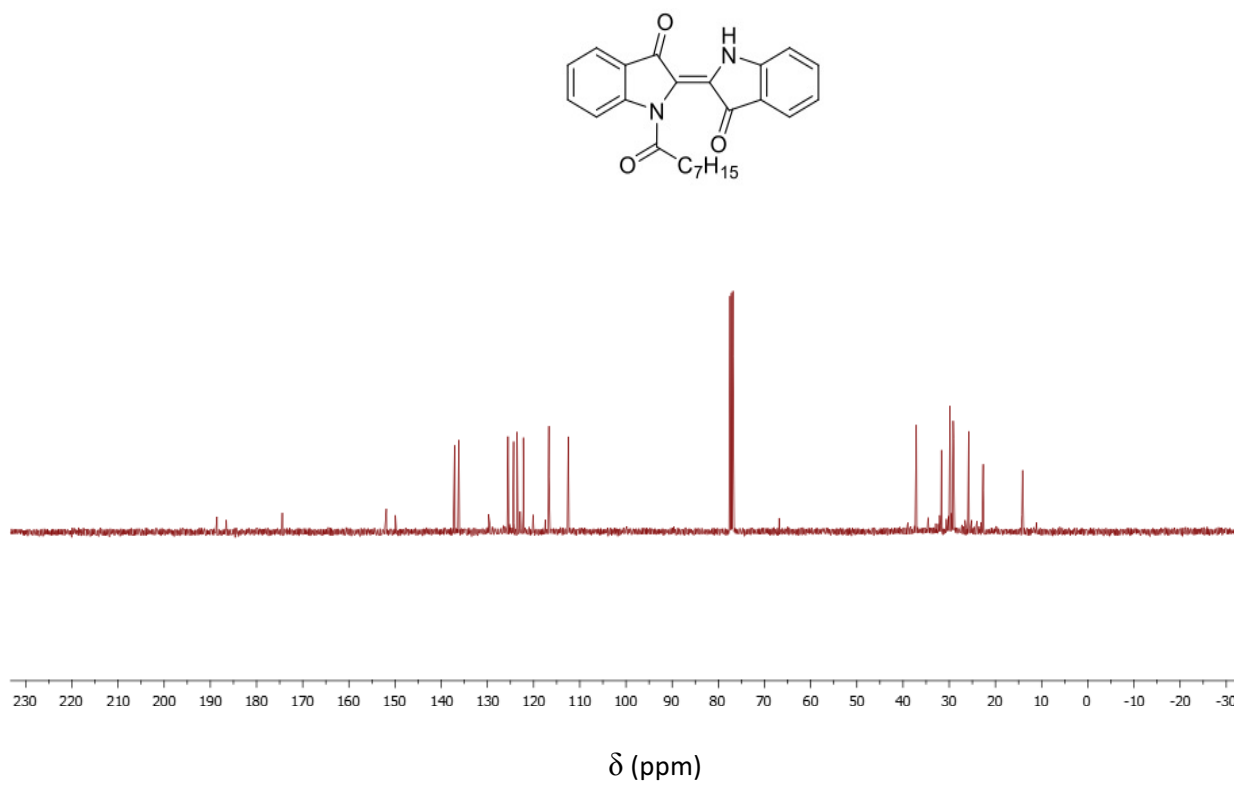

**Figure S8.** <sup>13</sup>C-NMR spectrum of compound **3** in CDCl<sub>3</sub>

## Mass Spectrum List Report

### Analysis Info

|               |                              |                  |                      |
|---------------|------------------------------|------------------|----------------------|
| Analysis Name | OSCUAT590405005.d            | Acquisition Date | 4/5/2016 12:52:48 PM |
| Method        | Tune_low_POS_Natee20130403.m | Operator         | Administrator        |
| Sample Name   | mono-octaindigo              | Instrument       | micrOTOF 72          |
|               | mono-octaindigo              |                  |                      |

### Acquisition Parameter

|             |          |                |          |                    |        |
|-------------|----------|----------------|----------|--------------------|--------|
| Source Type | ESI      | Ion Polarity   | Positive | Set Corrector Fill | 50 V   |
| Scan Range  | n/a      | Capillary Exit | 120.0 V  | Set Pulsar Pull    | 337 V  |
| Scan Begin  | 50 m/z   | Hexapole RF    | 150.0 V  | Set Pulsar Push    | 337 V  |
| Scan End    | 3000 m/z | Skimmer 1      | 45.0 V   | Set Reflector      | 1300 V |
|             |          | Hexapole 1     | 24.3 V   | Set Flight Tube    | 9000 V |
|             |          |                |          | Set Detector TOF   | 2295 V |

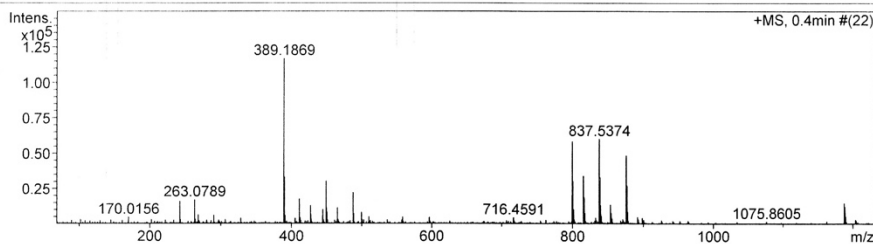

| #  | m/z       | I      | I %   | S/N   | FWHM   | Res. |
|----|-----------|--------|-------|-------|--------|------|
| 1  | 242.2806  | 16253  | 13.9  | 60.3  | 0.0492 | 4926 |
| 2  | 263.0789  | 17150  | 14.7  | 63.7  | 0.0570 | 4613 |
| 3  | 389.1869  | 116737 | 100.0 | 444.8 | 0.0810 | 4803 |
| 4  | 390.1903  | 33151  | 28.4  | 125.9 | 0.0764 | 5108 |
| 5  | 411.1693  | 17895  | 15.3  | 67.9  | 0.0821 | 5008 |
| 6  | 427.1464  | 13199  | 11.3  | 50.1  | 0.0910 | 4694 |
| 7  | 427.3785  | 6961   | 6.0   | 26.1  | 0.0874 | 4889 |
| 8  | 444.4075  | 10331  | 8.8   | 39.2  | 0.0861 | 5160 |
| 9  | 449.3452  | 30451  | 26.1  | 117.1 | 0.1271 | 3536 |
| 10 | 450.3419  | 9092   | 7.8   | 34.4  | 0.1224 | 3678 |
| 11 | 465.3295  | 11051  | 10.0  | 44.5  | 0.1060 | 4390 |
| 12 | 487.4489  | 22177  | 19.0  | 85.8  | 0.0967 | 5042 |
| 13 | 488.4512  | 7528   | 6.4   | 28.6  | 0.0976 | 5003 |
| 14 | 499.4479  | 8404   | 7.2   | 32.1  | 0.1013 | 4928 |
| 15 | 799.3552  | 58431  | 50.1  | 232.2 | 0.1582 | 5051 |
| 16 | 800.3596  | 30422  | 26.1  | 120.3 | 0.1635 | 4896 |
| 17 | 801.3883  | 10539  | 9.0   | 40.8  | 0.2175 | 3684 |
| 18 | 815.3333  | 34135  | 29.2  | 135.8 | 0.1652 | 4936 |
| 19 | 816.3357  | 19127  | 16.4  | 75.5  | 0.1637 | 4988 |
| 20 | 817.3379  | 7988   | 6.8   | 30.7  | 0.1959 | 4172 |
| 21 | 837.5374  | 60255  | 51.6  | 242.7 | 0.1829 | 4580 |
| 22 | 838.5427  | 33159  | 28.4  | 133.0 | 0.1887 | 4444 |
| 23 | 839.5884  | 13406  | 11.5  | 52.9  | 0.2412 | 3481 |
| 24 | 853.5232  | 13747  | 11.8  | 54.6  | 0.1770 | 4824 |
| 25 | 854.5271  | 8006   | 6.9   | 31.2  | 0.1745 | 4897 |
| 26 | 875.7395  | 48672  | 41.7  | 198.4 | 0.1716 | 5102 |
| 27 | 876.7419  | 27356  | 23.4  | 111.0 | 0.1762 | 4975 |
| 28 | 877.7465  | 8844   | 7.6   | 34.9  | 0.1807 | 4858 |
| 29 | 1187.5343 | 15096  | 12.9  | 75.6  | 0.2417 | 4913 |
| 30 | 1188.5380 | 12503  | 10.7  | 62.5  | 0.2511 | 4733 |

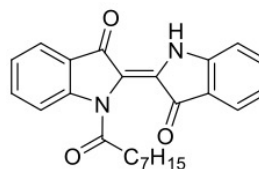

Chemical Formula:  
 $C_{24}H_{24}N_2O_3$   
 Exact Mass: 388.1787  
 Molecular Weight:  
 388.4590  
 $[M+H]^+$ : 389.1865

**Figure S9.** HR-ESI mass spectrum of compound 3

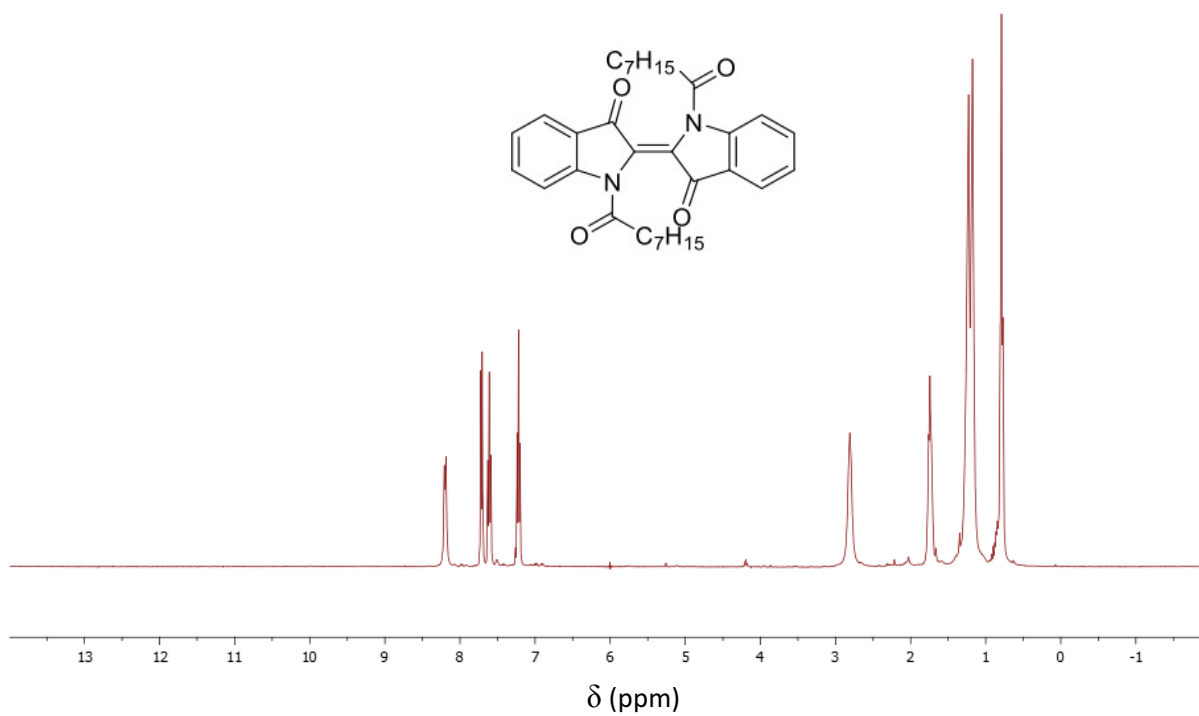

**Figure S10.**  $^1\text{H}$ -NMR spectrum of compound **4** in  $\text{CDCl}_3$ .

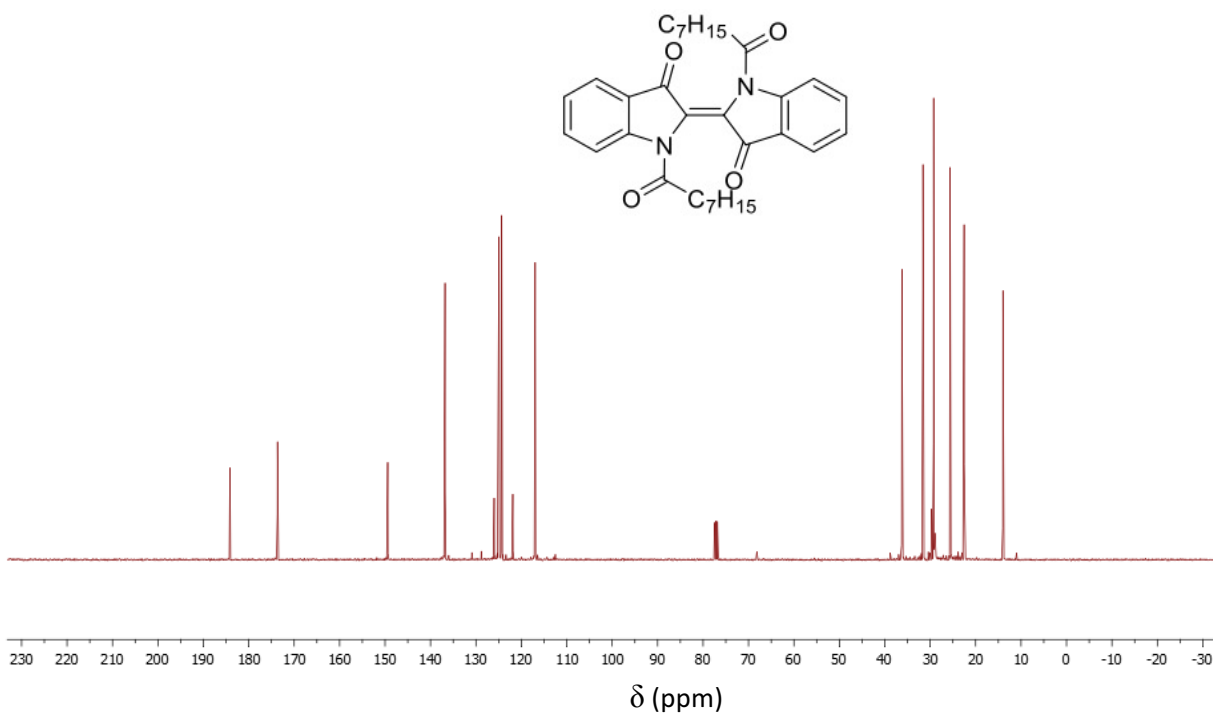

**Figure S11.**  $^{13}\text{C}$ -NMR spectrum of compound **4** in  $\text{CDCl}_3$ .



## Mass Spectrum List Report

### Analysis Info

Analysis Name OSCU5811090022.d  
 Method MKE\_tune\_low\_positive\_20130204.m  
 Sample Name di-octa indigo  
 di-octa indigo

Acquisition Date 11/10/2015 10:28:43 AM  
 Operator Administrator  
 Instrument micrOTOF 72

### Acquisition Parameter

Source Type ESI  
 Scan Range n/a  
 Scan Begin 50 m/z  
 Scan End 3000 m/z

Ion Polarity Positive  
 Capillary Exit 180.0 V  
 Hexapole RF 90.0 V  
 Skimmer 1 45.5 V  
 Hexapole 1 25.0 V

Set Corrector Fill 50 V  
 Set Pulsar Pull 337 V  
 Set Pulsar Push 337 V  
 Set Reflector 1300 V  
 Set Flight Tube 9000 V  
 Set Detector TOF 2093 V

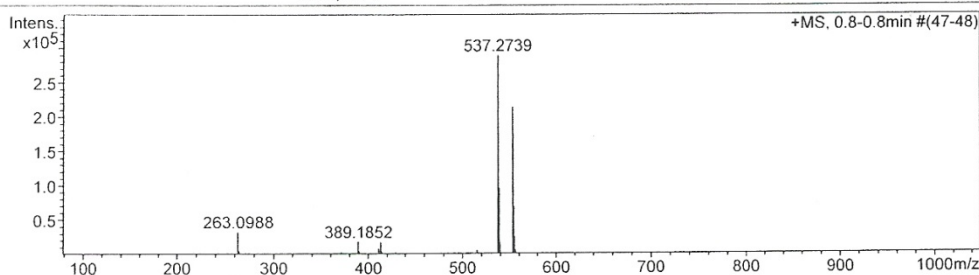

| #  | m/z      | I      | I%    | S/N    | FWHM   | Res. |
|----|----------|--------|-------|--------|--------|------|
| 1  | 263.0988 | 33186  | 11.5  | 1555.2 | 0.0886 | 2971 |
| 2  | 264.1003 | 5649   | 2.0   | 263.1  | 0.0926 | 2853 |
| 3  | 301.1449 | 1820   | 0.6   | 72.3   | 0.1071 | 2813 |
| 4  | 371.1719 | 3891   | 1.3   | 122.8  | 0.1001 | 3709 |
| 5  | 384.2461 | 1193   | 0.4   | 35.4   | 0.0853 | 4507 |
| 6  | 389.1852 | 18889  | 6.5   | 570.6  | 0.1012 | 3847 |
| 7  | 390.1878 | 4965   | 1.7   | 148.7  | 0.1060 | 3680 |
| 8  | 411.1686 | 9092   | 3.1   | 258.4  | 0.1131 | 3634 |
| 9  | 412.1713 | 2629   | 0.9   | 73.5   | 0.1190 | 3464 |
| 10 | 413.2636 | 17922  | 6.2   | 507.8  | 0.1083 | 3814 |
| 11 | 414.2668 | 4377   | 1.5   | 122.7  | 0.1136 | 3647 |
| 12 | 425.2090 | 2496   | 0.9   | 67.4   | 0.1241 | 3426 |
| 13 | 427.1636 | 1429   | 0.5   | 37.8   | 0.1712 | 2494 |
| 14 | 429.2364 | 3449   | 1.2   | 92.7   | 0.1166 | 3683 |
| 15 | 441.2859 | 1675   | 0.6   | 42.9   | 0.1442 | 3059 |
| 16 | 449.3544 | 2132   | 0.7   | 53.9   | 0.1206 | 3727 |
| 17 | 513.2779 | 1318   | 0.5   | 28.2   | 0.1623 | 3162 |
| 18 | 515.2903 | 6440   | 2.2   | 143.5  | 0.1431 | 3601 |
| 19 | 516.2940 | 2355   | 0.8   | 51.3   | 0.1352 | 3818 |
| 20 | 527.2911 | 2871   | 1.0   | 61.5   | 0.1468 | 3591 |
| 21 | 537.2739 | 289411 | 100.0 | 6242.2 | 0.1423 | 3777 |
| 22 | 538.2768 | 96356  | 33.3  | 2074.5 | 0.1397 | 3854 |
| 23 | 539.2771 | 17396  | 6.0   | 374.3  | 0.1415 | 3812 |
| 24 | 540.2792 | 2649   | 0.9   | 55.8   | 0.1429 | 3782 |
| 25 | 553.2478 | 213831 | 73.9  | 4813.0 | 0.1441 | 3840 |
| 26 | 554.2500 | 68814  | 23.8  | 1552.4 | 0.1442 | 3845 |
| 27 | 555.2493 | 25992  | 9.0   | 587.1  | 0.1438 | 3862 |
| 28 | 556.2514 | 6186   | 2.1   | 138.9  | 0.1513 | 3677 |
| 29 | 557.2653 | 1306   | 0.5   | 28.1   | 0.1613 | 3455 |
| 30 | 567.2873 | 1287   | 0.4   | 28.5   | 0.1616 | 3511 |

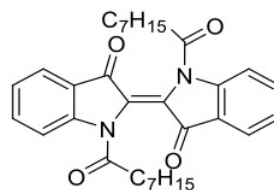

Chemical Formula:  
 $C_{32}H_{38}N_2O_4$   
 Exact Mass: 514.2832  
 Molecular Weight:  
 514.6551  
 $[M+Na]^+$ : 537.2729

**Figure S12.** HR-ESI mass spectrum of compound 4

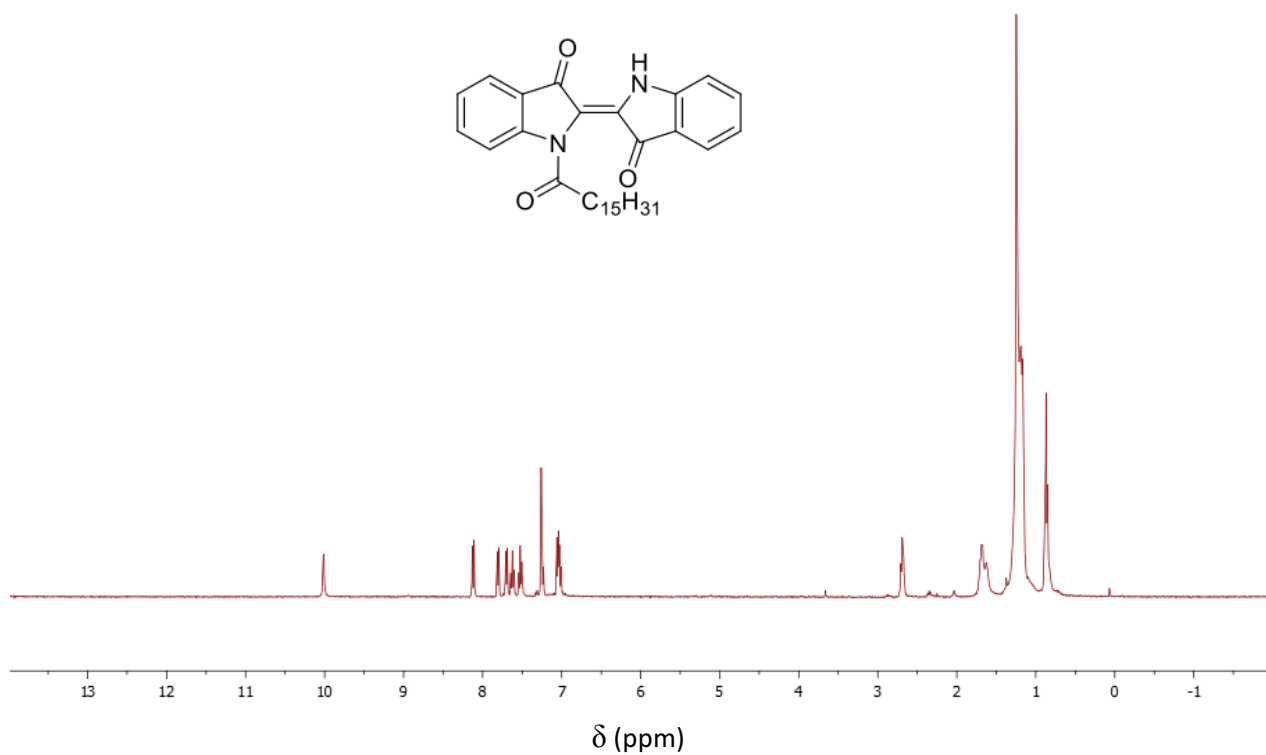

**Figure S13.**  $^1\text{H}$ -NMR spectrum of compound **5** in  $\text{CDCl}_3$ .

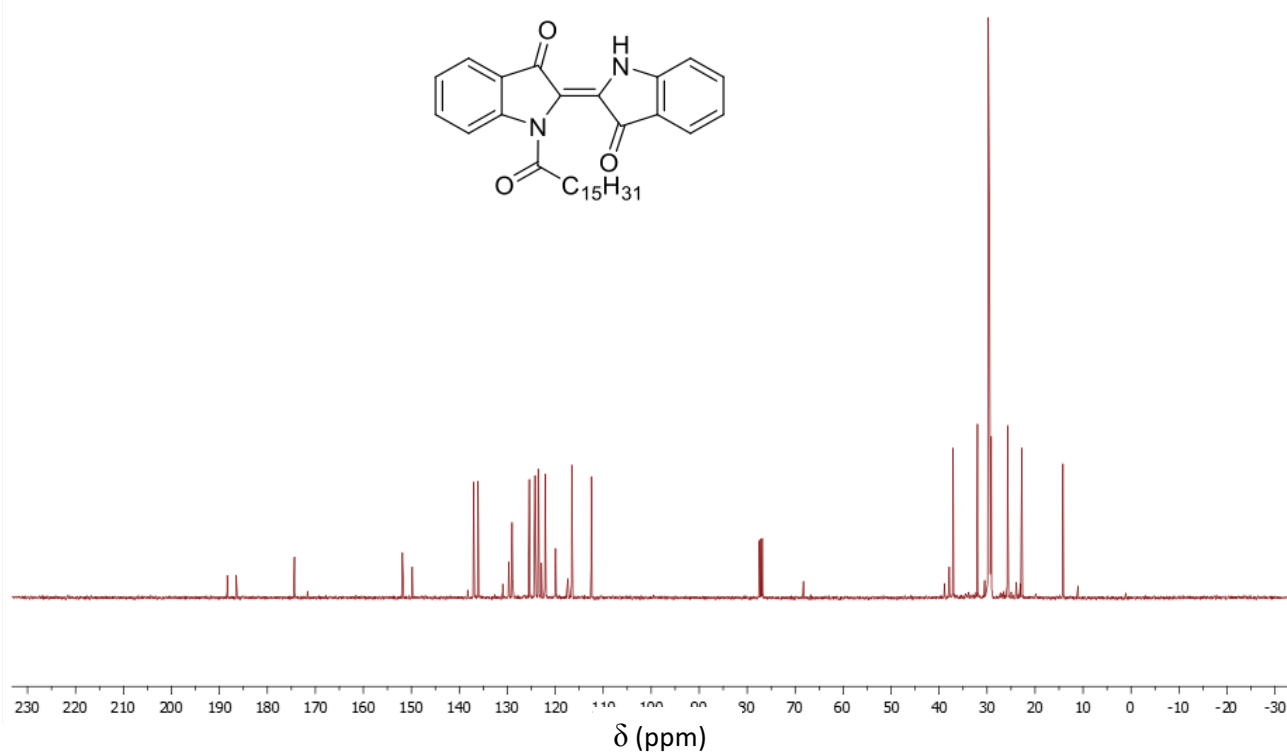

**Figure S14.**  $^{13}\text{C}$ -NMR spectrum of compound **5** in  $\text{CDCl}_3$ .

## Mass Spectrum List Report

### Analysis Info

|               |                          |                  |                       |
|---------------|--------------------------|------------------|-----------------------|
| Analysis Name | OSCUPP580211002.d        | Acquisition Date | 2/11/2015 11:14:31 AM |
| Method        | MKE_tune_wide_20130204.m | Operator         | Administrator         |
| Sample Name   | mono-indigo              | Instrument       | micrOTOF 72           |
|               | mono-indigo              |                  |                       |

### Acquisition Parameter

|             |          |                |          |                    |        |
|-------------|----------|----------------|----------|--------------------|--------|
| Source Type | ESI      | Ion Polarity   | Positive | Set Corrector Fill | 79 V   |
| Scan Range  | n/a      | Capillary Exit | 200.0 V  | Set Pulsar Pull    | 406 V  |
| Scan Begin  | 50 m/z   | Hexapole RF    | 400.0 V  | Set Pulsar Push    | 388 V  |
| Scan End    | 3000 m/z | Skimmer 1      | 45.0 V   | Set Reflector      | 1300 V |
|             |          | Hexapole 1     | 25.0 V   | Set Flight Tube    | 9000 V |
|             |          |                |          | Set Detector TOF   | 1910 V |

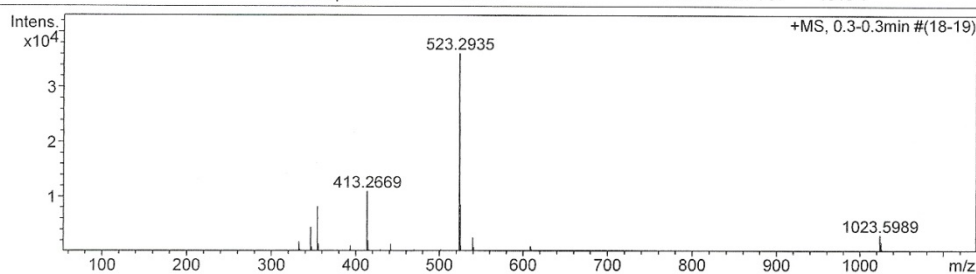

| #  | m/z       | I     | I%    | S/N    | FWHM   | Res. |
|----|-----------|-------|-------|--------|--------|------|
| 1  | 332.2937  | 1773  | 4.9   | 508.8  | 0.0406 | 8181 |
| 2  | 333.2965  | 407   | 1.1   | 116.2  | 0.0411 | 8116 |
| 3  | 346.2710  | 4434  | 12.3  | 1213.4 | 0.0387 | 8950 |
| 4  | 347.2738  | 813   | 2.3   | 221.5  | 0.0405 | 8566 |
| 5  | 348.2819  | 181   | 0.5   | 49.1   | 0.0497 | 7011 |
| 6  | 354.2760  | 8193  | 22.8  | 2165.5 | 0.0403 | 8799 |
| 7  | 355.2790  | 1444  | 4.0   | 379.9  | 0.0432 | 8229 |
| 8  | 393.2958  | 1036  | 2.9   | 234.7  | 0.0461 | 8529 |
| 9  | 394.2990  | 250   | 0.7   | 56.1   | 0.0455 | 8672 |
| 10 | 413.2669  | 10957 | 30.4  | 2313.5 | 0.0509 | 8121 |
| 11 | 414.2702  | 2056  | 5.7   | 432.4  | 0.0492 | 8417 |
| 12 | 415.2717  | 268   | 0.7   | 56.0   | 0.0473 | 8772 |
| 13 | 429.2475  | 324   | 0.9   | 64.6   | 0.0536 | 8014 |
| 14 | 441.2984  | 1381  | 3.8   | 266.0  | 0.0542 | 8139 |
| 15 | 442.3038  | 289   | 0.8   | 55.2   | 0.0633 | 6987 |
| 16 | 449.3610  | 172   | 0.5   | 32.1   | 0.0641 | 7005 |
| 17 | 469.3377  | 268   | 0.7   | 47.3   | 0.0879 | 5338 |
| 18 | 501.3128  | 268   | 0.7   | 43.1   | 0.0717 | 6992 |
| 19 | 523.2935  | 35992 | 100.0 | 5526.5 | 0.0624 | 8384 |
| 20 | 524.2966  | 8546  | 23.7  | 1308.7 | 0.0577 | 9083 |
| 21 | 525.3006  | 985   | 2.7   | 150.2  | 0.0627 | 8376 |
| 22 | 539.2676  | 2510  | 7.0   | 372.0  | 0.0585 | 9221 |
| 23 | 540.2704  | 733   | 2.0   | 108.6  | 0.0594 | 9102 |
| 24 | 541.2696  | 247   | 0.7   | 36.4   | 0.0630 | 8594 |
| 25 | 608.5011  | 980   | 2.7   | 163.1  | 0.0702 | 8669 |
| 26 | 609.5020  | 388   | 1.1   | 64.4   | 0.0674 | 9037 |
| 27 | 661.5327  | 202   | 0.6   | 36.7   | 0.0821 | 8062 |
| 28 | 1023.5989 | 2949  | 8.2   | 866.5  | 0.1036 | 9878 |
| 29 | 1024.5966 | 1705  | 4.7   | 501.3  | 0.1131 | 9061 |
| 30 | 1025.5989 | 394   | 1.1   | 115.7  | 0.1205 | 8508 |

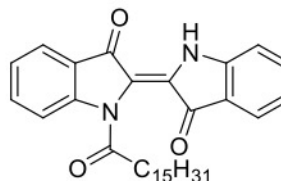

**Chemical Formula:**  
 $C_{32}H_{40}N_2O_3$   
**Exact Mass:** 500.3039  
**Molecular Weight:**  
 500.6716  
**[M+Na]<sup>+</sup>:** 523.2937

**Figure S15.** HR-ESI mass spectrum of compound **5**

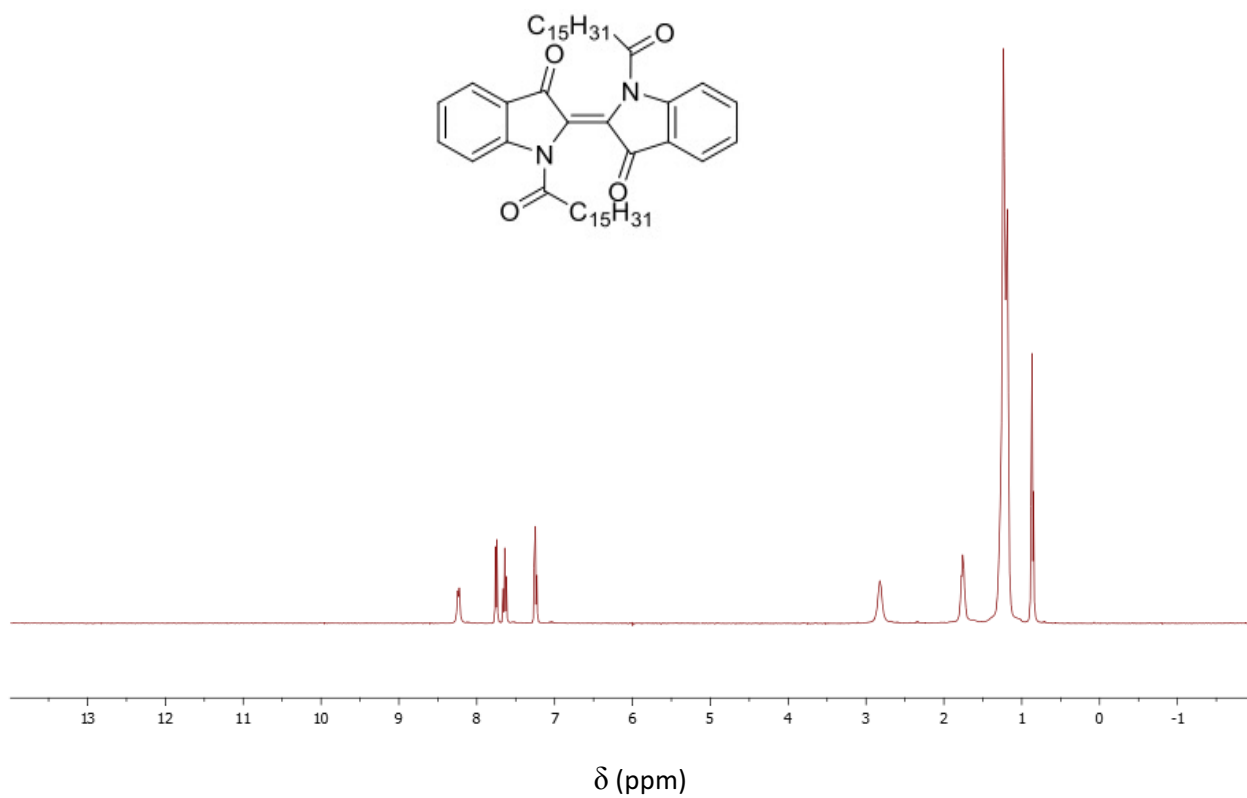

**Figure S16.** <sup>1</sup>H-NMR spectrum of compound **6** in CDCl<sub>3</sub>

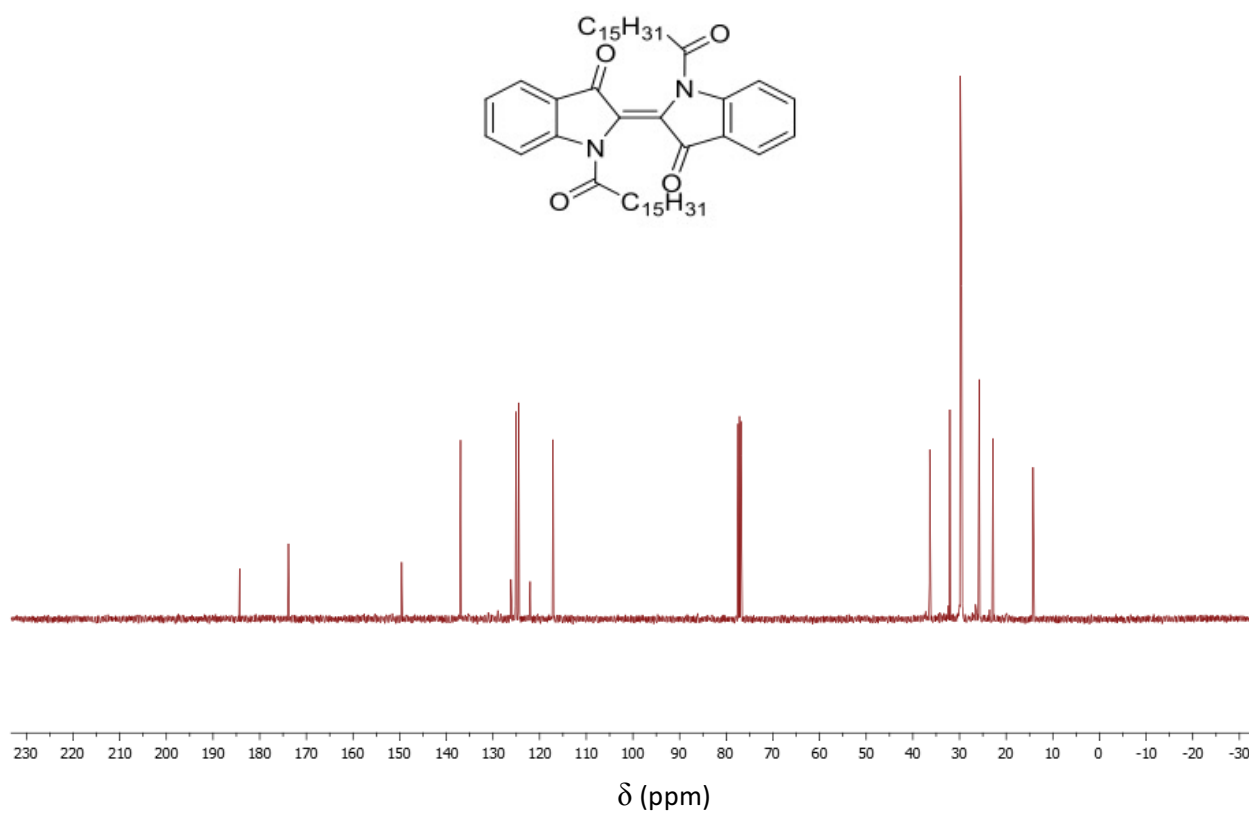

**Figure S17.** <sup>13</sup>C-NMR spectrum of compound **6** in CDCl<sub>3</sub>

## Mass Spectrum List Report

### Analysis Info

Analysis Name OSCUPP580211001.d  
 Method MKE\_tune\_wide\_20130204.m  
 Sample Name di-indigo  
 di-indigo

Acquisition Date 2/11/2015 11:10:22 AM  
 Operator Administrator  
 Instrument micrOTOF 72

### Acquisition Parameter

|             |          |                |          |                    |        |
|-------------|----------|----------------|----------|--------------------|--------|
| Source Type | ESI      | Ion Polarity   | Positive | Set Corrector Fill | 79 V   |
| Scan Range  | n/a      | Capillary Exit | 200.0 V  | Set Pulsar Pull    | 406 V  |
| Scan Begin  | 50 m/z   | Hexapole RF    | 400.0 V  | Set Pulsar Push    | 388 V  |
| Scan End    | 3000 m/z | Skimmer 1      | 45.0 V   | Set Reflector      | 1300 V |
|             |          | Hexapole 1     | 25.0 V   | Set Flight Tube    | 9000 V |
|             |          |                |          | Set Detector TOF   | 1910 V |

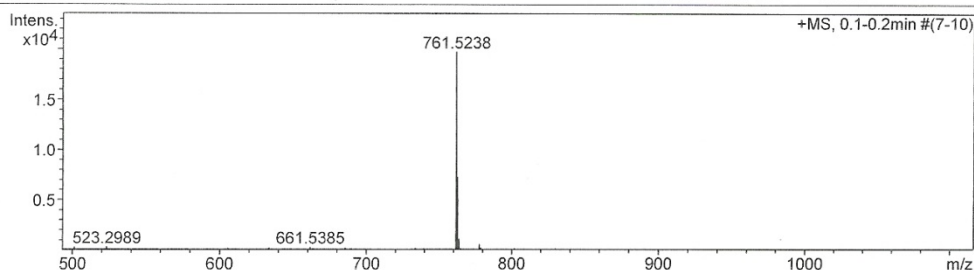

| #  | m/z       | I     | I%    | S/N    | FWHM   | Res.  |
|----|-----------|-------|-------|--------|--------|-------|
| 1  | 318.2378  | 168   | 0.9   | 55.3   | 0.0456 | 6975  |
| 2  | 346.2705  | 744   | 3.8   | -231.8 | 0.0386 | 8967  |
| 3  | 347.2712  | 160   | 0.8   | 49.4   | 0.0450 | 7714  |
| 4  | 393.2943  | 295   | 1.5   | 77.9   | 0.0458 | 8582  |
| 5  | 413.2661  | 9011  | 45.9  | 2243.3 | 0.0504 | 8195  |
| 6  | 414.2696  | 1674  | 8.5   | 415.2  | 0.0520 | 7965  |
| 7  | 415.2691  | 254   | 1.3   | 62.6   | 0.0455 | 9127  |
| 8  | 441.1143  | 976   | 5.0   | 223.8  | 0.0549 | 8033  |
| 9  | 441.2969  | 1372  | 7.0   | 314.6  | 0.0551 | 8012  |
| 10 | 442.1157  | 208   | 1.1   | 47.3   | 0.0566 | 7810  |
| 11 | 442.3009  | 306   | 1.6   | 69.6   | 0.0585 | 7565  |
| 12 | 463.0964  | 232   | 1.2   | 49.9   | 0.0513 | 9028  |
| 13 | 469.3333  | 245   | 1.2   | 51.8   | 0.0699 | 6713  |
| 14 | 501.3109  | 294   | 1.5   | 57.4   | 0.0751 | 6674  |
| 15 | 523.2989  | 317   | 1.6   | 58.9   | 0.0834 | 6274  |
| 16 | 605.4789  | 229   | 1.2   | 37.6   | 0.0873 | 6937  |
| 17 | 633.5056  | 216   | 1.1   | 34.3   | 0.0852 | 7438  |
| 18 | 661.5385  | 315   | 1.6   | 48.7   | 0.0867 | 7629  |
| 19 | 685.4319  | 207   | 1.1   | 30.9   | 0.0761 | 9003  |
| 20 | 689.5655  | 159   | 0.8   | 23.6   | 0.0829 | 8314  |
| 21 | 733.5275  | 176   | 0.9   | 24.9   | 0.1181 | 6210  |
| 22 | 761.5238  | 19646 | 100.0 | 2986.6 | 0.0863 | 8822  |
| 23 | 762.5257  | 7294  | 37.1  | 1110.7 | 0.0874 | 8720  |
| 24 | 763.5307  | 1133  | 5.8   | 172.3  | 0.0918 | 8315  |
| 25 | 764.5334  | 145   | 0.7   | 21.6   | 0.1150 | 6649  |
| 26 | 777.4943  | 577   | 2.9   | 90.1   | 0.0882 | 8816  |
| 27 | 778.4996  | 256   | 1.3   | 39.6   | 0.0906 | 8594  |
| 28 | 1500.0498 | 620   | 3.2   | 192.6  | 0.1660 | 9037  |
| 29 | 1501.0585 | 640   | 3.3   | 198.9  | 0.1848 | 8121  |
| 30 | 1502.0532 | 262   | 1.3   | 81.0   | 0.1337 | 11237 |

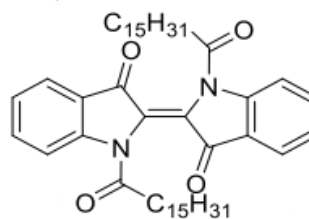

Chemical Formula:  
 $C_{48}H_{70}N_2O_4$   
 Exact Mass: 738.5336  
 Molecular Weight:  
 739.0804  
 $[M+Na]^+$ : 761.5233

**Figure S18.** HR-ESI mass spectrum of compound **6**

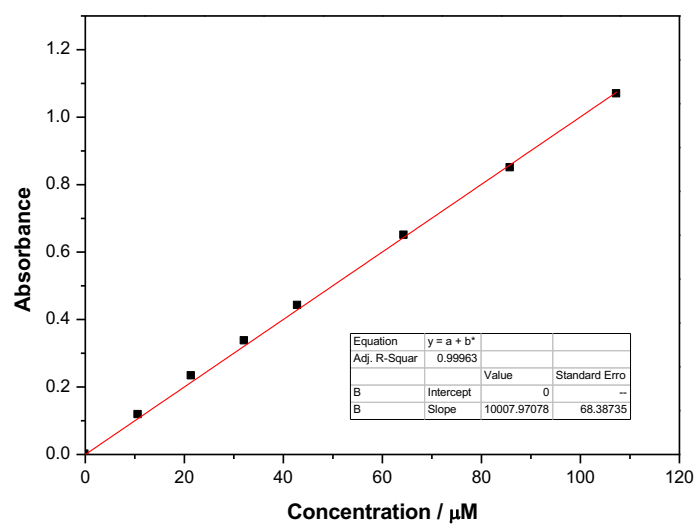

**Figure S19.** Standard calibration curve of compound **1** in toluene at 595 nm

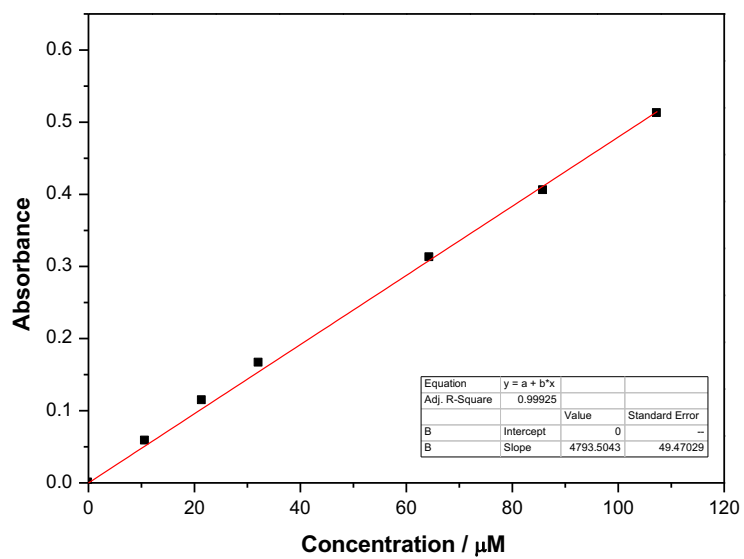

**Figure S20.** Standard calibration curve of compound **1** in diesel at 590 nm

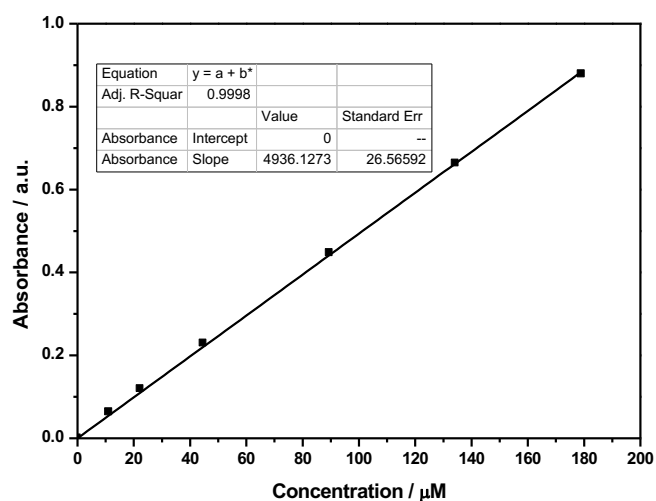

**Figure S21.** Standard calibration curve of compound **3** in toluene at 575 nm

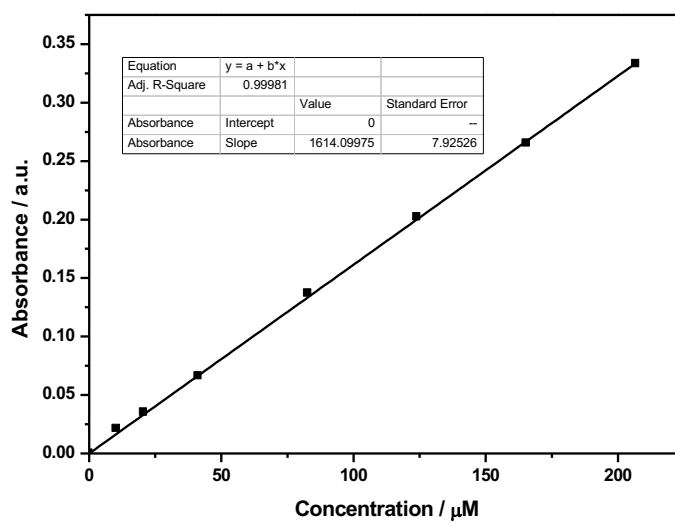

**Figure S22.** Standard calibration curve of compound **3** in diesel at 570 nm

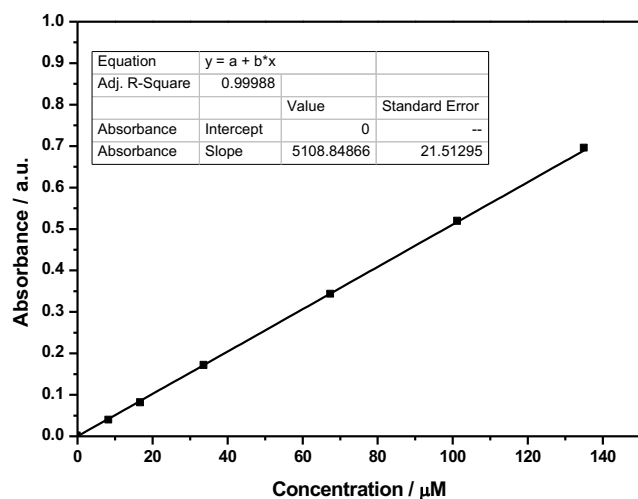

**Figure S23.** Standard calibration curve of compound **4** in toluene at 570 nm

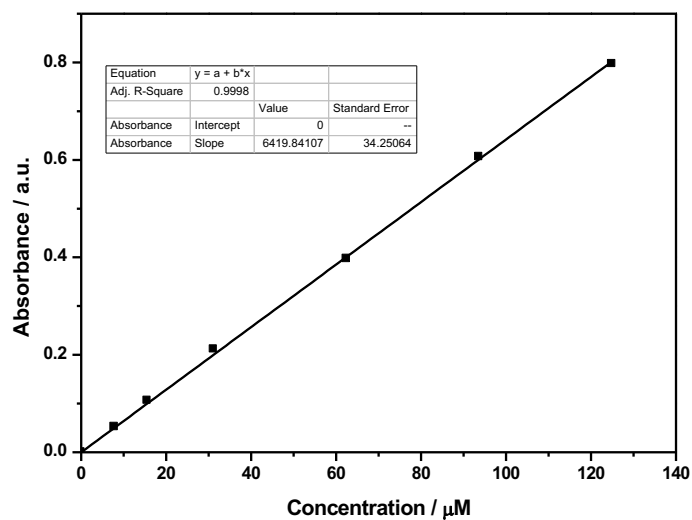

**Figure S24.** Standard calibration curve of compound **4** in diesel at 570 nm



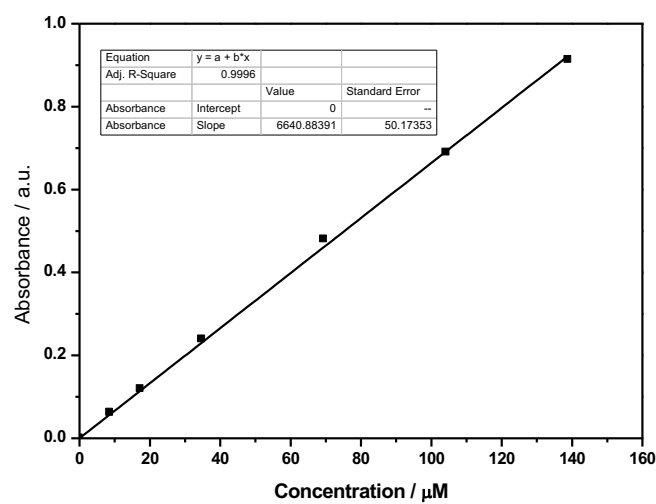

**Figure S25.** Standard calibration curve of compound **5** in toluene at 575 nm

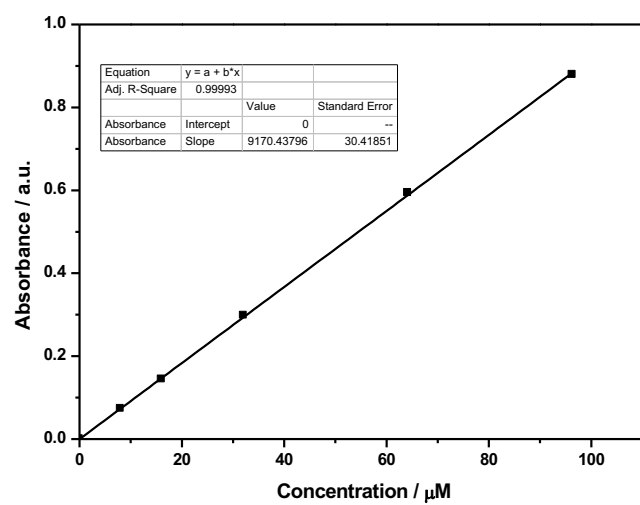

**Figure S26.** Standard calibration curve of compound **5** in diesel at 575 nm

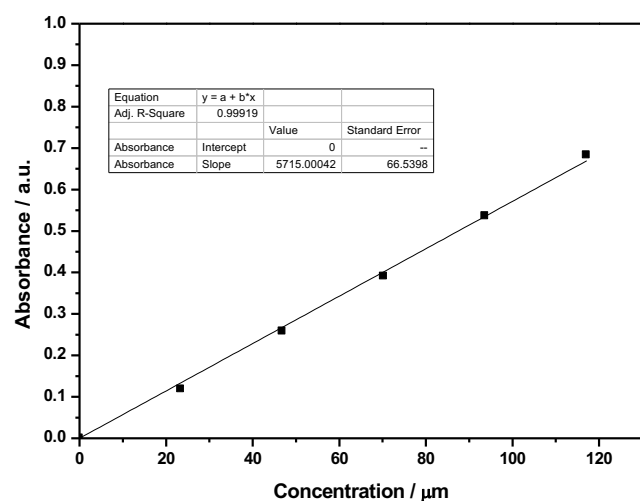

**Figure S27.** Standard calibration curve of compound **6** in toluene at 570 nm

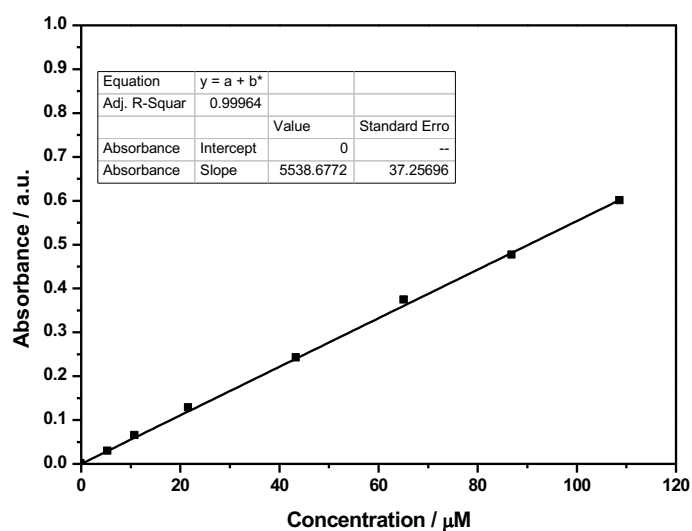

**Figure S28.** Standard calibration curve of compound **6** in diesel at 570 nm
